# Supplementary material for: Comparative Analysis of the Major Chemical Constituents in Salvia miltiorrhiza Roots, Stems, Leaves and Flowers during Different Growth Periods by UPLC-TQ-MS/MS and HPLC-ELSD Methods
Source: PubMed Central journal article supplement (PMC6154317; doi:10.3390/molecules22050771), 2017-05-10
Supplement: molecules-22-00771-s001.pdf [file molecules-22-00771-s001.pdf]

**Table S1.** Dynamic accumulation on the contents of salvianolic acids in roots of *S.miltiorrhiza* (mg/g)

| Harvest year | Harvest date | Danshensu | Protocatechuic aldehyde | Caffeic acid | Rosmarinic acid | Lithospermic acid | Salvianolic acid B | Salvianolic acid A |
|--------------|--------------|-----------|-------------------------|--------------|-----------------|-------------------|--------------------|--------------------|
| 2016         | 4.01         | 0.513     | 0.020                   | 0.039        | 3.434           | 1.848             | 39.403             | 0.033              |
|              | 4.15         | 0.370     | 0.019                   | 0.040        | 2.823           | 1.308             | 34.584             | 0.016              |
|              | 4.29         | 1.353     | 0.018                   | 0.039        | 6.636           | 5.507             | 52.174             | 0.199              |
|              | 5.14         | 0.951     | 0.022                   | 0.044        | 6.638           | 4.231             | 50.290             | 0.027              |
|              | 5.30         | 0.836     | 0.022                   | 0.033        | 7.085           | 3.741             | 49.642             | 0.040              |
| 2015         | 6.08         | 0.052     | 0.008                   | 0.007        | 7.932           | 3.971             | 50.020             | 0.080              |
|              | 6.18         | 0.115     | 0.008                   | 0.006        | 4.548           | 4.036             | 37.768             | 0.078              |
|              | 6.25         | 0.178     | 0.008                   | 0.006        | 4.613           | 4.240             | 35.384             | 0.112              |
|              | 7.04         | 0.133     | 0.009                   | 0.010        | 6.101           | 4.794             | 43.110             | 0.093              |
|              | 7.14         | 0.075     | 0.009                   | 0.012        | 5.840           | 1.139             | 36.377             | 0.027              |
|              | 7.23         | 0.113     | 0.010                   | 0.014        | 8.523           | 2.738             | 48.883             | 0.043              |
|              | 8.12         | 0.229     | 0.010                   | 0.013        | 8.206           | 3.589             | 50.333             | 0.061              |
|              | 8.26         | 0.189     | 0.013                   | 0.028        | 6.799           | 2.238             | 43.267             | 0.044              |
|              | 9.19         | 0.313     | 0.014                   | 0.025        | 5.941           | 3.035             | 43.494             | 0.068              |
|              | 10.19        | 0.701     | 0.011                   | 0.017        | 5.911           | 4.330             | 47.258             | 0.081              |
|              | 11.29        | 0.470     | 0.016                   | 0.030        | 3.819           | 2.126             | 40.070             | 0.137              |
|              | 12.30        | 0.898     | 0.013                   | 0.023        | 5.932           | 4.379             | 47.379             | 0.075              |

**Table S2.** Dynamic accumulation on the contents of tanshinones in roots of *S.miltiorrhiza* (mg/g)

| Harvest year | Harvest date | Dihydrotanshinone I | Miltirone | Tanshinone I | Tanshinone IIA | Miltiradiene | Cryptotanshinone | Tanshinone IIB | Neocryptotanshione |
|--------------|--------------|---------------------|-----------|--------------|----------------|--------------|------------------|----------------|--------------------|
| 2016         | 4.01         | 0.546               | 1.406     | 0.764        | 0.843          | 0.691        | 1.220            | 0.014          | 0.417              |
|              | 4.15         | 0.520               | 1.542     | 0.715        | 0.767          | 0.626        | 1.230            | 0.015          | 0.398              |
|              | 4.29         | 0.557               | 0.563     | 0.611        | 0.649          | 0.544        | 0.951            | 0.011          | 0.324              |
|              | 5.14         | 0.676               | 1.514     | 0.727        | 0.749          | 0.637        | 1.345            | 0.015          | 0.430              |
|              | 5.30         | 0.715               | 1.750     | 0.894        | 0.941          | 0.802        | 1.509            | 0.020          | 0.528              |
| 2015         | 6.08         | 0.247               | 0.344     | 0.309        | 0.612          | 0.356        | 0.880            | 0.001          | 0.101              |
|              | 6.18         | 0.346               | 0.410     | 0.346        | 0.598          | 0.364        | 1.083            | 0.002          | 0.168              |
|              | 6.25         | 0.186               | -         | 0.119        | 0.283          | 0.132        | 0.491            | -              | 0.030              |
|              | 7.04         | 0.293               | 0.070     | 0.268        | 0.460          | 0.274        | 0.581            | 0.001          | 0.046              |
|              | 7.14         | 0.621               | 0.873     | 0.413        | 0.624          | 0.415        | 1.323            | 0.003          | 0.167              |
|              | 7.23         | 0.775               | 0.750     | 0.540        | 0.755          | 0.539        | 1.484            | 0.008          | 0.214              |
|              | 8.12         | 0.342               | 0.345     | 0.544        | 0.780          | 0.542        | 0.920            | 0.006          | 0.137              |
|              | 8.26         | 0.714               | 0.652     | 0.457        | 0.608          | 0.434        | 1.188            | 0.007          | 0.232              |
|              | 9.19         | 0.577               | 0.917     | 0.569        | 0.735          | 0.543        | 1.123            | 0.011          | 0.202              |
|              | 10.19        | 0.350               | 0.509     | 0.558        | 0.689          | 0.510        | 0.917            | 0.006          | 0.203              |
|              | 11.29        | 0.491               | 0.960     | 0.708        | 0.837          | 0.644        | 1.267            | 0.012          | 0.451              |
|              | 12.30        | 0.421               | 0.648     | 0.620        | 0.698          | 0.553        | 1.016            | 0.008          | 0.292              |

The “-” represents not detected.

**Table S3.** Dynamic accumulation on the contents of salvianolic acids, flavonoids, and triterpenes in the stems of *S. miltiorrhiza* (mg/g)

| Harvest year | Harvest date | Danshensu | Protocatechuic aldehyde | Caffeic acid | Rosmarinic acid | Lithospermic acid | Salvianolic acid B | Salvianolic acid A | Rutin | Isoquercitrin | Astragalins | Oleanolic acid | Ursolic acid |
|--------------|--------------|-----------|-------------------------|--------------|-----------------|-------------------|--------------------|--------------------|-------|---------------|-------------|----------------|--------------|
| 2016         | 4.15         | 0.486     | 0.022                   | 0.083        | 5.088           | 0.057             | 16.298             | 0.007              | 0.108 | -             | 0.066       | 0.693          | 1.481        |
|              | 4.29         | 0.539     | 0.041                   | 0.074        | 3.852           | 0.059             | 15.600             | 0.063              | 0.530 | 0.085         | 0.133       | 0.776          | 1.640        |
|              | 5.14         | 0.419     | 0.017                   | 0.050        | 3.816           | -                 | 14.942             | -                  | 0.392 | 0.001         | 0.078       | 0.745          | 1.649        |
|              | 5.30         | 0.366     | 0.018                   | 0.063        | 5.354           | 0.071             | 16.913             | 0.010              | 0.635 | 0.127         | 0.102       | 0.750          | 1.915        |
| 2015         | 6.08         | 0.391     | 0.035                   | 0.079        | 4.979           | 0.120             | 15.434             | 0.064              | -     | -             | 0.067       | 0.724          | 1.901        |
|              | 6.18         | 0.355     | 0.022                   | 0.053        | 4.574           | 0.166             | 14.513             | 0.049              | 0.538 | 0.162         | 0.085       | 0.817          | 2.611        |
|              | 6.25         | 0.320     | 0.020                   | 0.058        | 5.397           | 0.438             | 17.268             | 0.028              | 0.337 | 0.213         | 0.068       | 0.512          | 1.061        |
|              | 7.04         | 0.397     | 0.020                   | 0.069        | 7.309           | 0.762             | 21.991             | 0.026              | 0.826 | 0.121         | 0.063       | 0.633          | 1.478        |
|              | 7.14         | 0.487     | 0.023                   | 0.076        | 7.216           | 0.657             | 19.702             | 0.046              | 0.345 | 0.054         | 0.051       | 0.691          | 1.562        |
|              | 7.23         | 0.477     | 0.025                   | 0.082        | 9.175           | 0.998             | 22.742             | 0.060              | 0.649 | 0.192         | 0.075       | 0.679          | 1.438        |
|              | 8.12         | 0.534     | 0.028                   | 0.097        | 7.629           | 1.901             | 24.513             | 0.034              | 0.396 | 0.087         | 0.052       | 0.585          | 1.253        |
|              | 8.26         | 0.509     | 0.077                   | 0.122        | 7.013           | 1.339             | 20.360             | 0.115              | 0.516 | 0.124         | 0.142       | 0.664          | 1.396        |
| 9.19         | 0.540        | 0.024     | 0.081                   | 8.224        | 2.361           | 25.533            | 0.048              | 0.351              | 0.139 | 0.111         | 0.634       | 1.424          |              |

The “-” represents not detected.

**Table S4.** Dynamic accumulation on the contents of salvianolic acids, flavonoids, and triterpenes in the leaves of *S. miltiorrhiza* (mg/g)

| Harvest year | Harvest date | Danshensu | Protocatechuic aldehyde | Caffeic acid | Rosmarinic acid | Lithospermic acid | Salvianolic acid B | Salvianolic acid A | Rutin | Isoquercitrin | Astragalins | Oleanolic acid | Ursolic acid |
|--------------|--------------|-----------|-------------------------|--------------|-----------------|-------------------|--------------------|--------------------|-------|---------------|-------------|----------------|--------------|
| 2016         | 4.01         | 0.765     | 0.021                   | 0.074        | 3.420           | -                 | 13.960             | 0.009              | 1.246 | 0.188         | 0.097       | 0.461          | 0.923        |
|              | 4.15         | 0.677     | 0.020                   | 0.083        | 5.360           | -                 | 16.515             | -                  | 2.483 | 0.469         | 0.214       | 0.487          | 0.985        |
|              | 4.29         | 1.011     | 0.024                   | 0.075        | 10.075          | 0.224             | 23.823             | 0.012              | 3.310 | 0.995         | 0.233       | 0.472          | 0.976        |
|              | 5.14         | 1.070     | 0.023                   | 0.095        | 12.090          | 0.466             | 22.651             | -                  | 4.235 | 1.057         | 0.241       | 0.437          | 0.874        |
|              | 5.30         | 0.814     | 0.025                   | 0.102        | 11.382          | 0.356             | 25.215             | 0.008              | 3.766 | 1.206         | 0.193       | 0.522          | 1.177        |
| 2015         | 6.08         | 1.241     | 0.086                   | 0.160        | 10.924          | 1.284             | 25.687             | 0.106              | 3.562 | 1.034         | 0.248       | 0.643          | 1.598        |
|              | 6.18         | 1.219     | 0.026                   | 0.095        | 10.991          | 0.679             | 23.967             | 0.020              | 4.035 | 1.689         | 0.251       | 0.619          | 1.534        |
|              | 6.25         | 1.000     | 0.036                   | 0.136        | 11.604          | 0.992             | 24.383             | 0.010              | 2.313 | 1.283         | 0.191       | 0.551          | 1.173        |
|              | 7.04         | 0.876     | 0.023                   | 0.080        | 12.268          | 1.313             | 24.245             | 0.007              | 4.024 | 1.189         | 0.191       | 0.562          | 1.305        |
|              | 7.14         | 0.606     | 0.027                   | 0.075        | 5.953           | 0.197             | 13.641             | 0.027              | 2.801 | 1.164         | 0.147       | 0.603          | 1.245        |
|              | 7.23         | 1.059     | 0.026                   | 0.103        | 13.379          | 1.248             | 30.826             | 0.033              | 3.813 | 1.560         | 0.259       | 0.591          | 1.182        |
|              | 8.12         | 1.155     | 0.036                   | 0.126        | 10.560          | 2.333             | 29.914             | 0.016              | 1.785 | 0.768         | 0.130       | 0.524          | 1.116        |
|              | 8.26         | 0.859     | 0.028                   | 0.080        | 11.350          | 1.368             | 24.210             | 0.011              | 0.633 | 0.374         | 0.140       | 0.493          | 0.979        |
|              | 9.19         | 0.878     | 0.029                   | 0.108        | 12.278          | 1.793             | 27.140             | 0.022              | 1.085 | 0.597         | 0.249       | 0.509          | 1.000        |

The “-” represents not detected.

**Table S5.** Dynamic accumulation on the contents of salvanolic acids, flavonoids, and triterpenes in the flowers of *S. miltiorrhiza* (mg/g)

| Harvest year | Harvest date | Danshensu | Protocatechuic aldehyde | Caffeic acid | Rosmarinic acid | Lithospermic acid | Salvanolic acid B | Salvanolic acid A | Rutin | Isoquercitrin | Astragalinn | Oleanolic acid | Ursolic acid |
|--------------|--------------|-----------|-------------------------|--------------|-----------------|-------------------|-------------------|-------------------|-------|---------------|-------------|----------------|--------------|
| 2016         | 4.29         | 1.304     | 0.021                   | 0.123        | 13.555          | 0.606             | 29.075            | 0.274             | 1.595 | 1.313         | 1.115       | 0.567          | 1.587        |
|              | 5.14         | 0.979     | 0.033                   | 0.223        | 15.148          | 0.480             | 23.656            | 0.294             | 1.638 | 1.104         | 1.108       | 0.592          | 1.924        |
|              | 5.30         | 0.664     | 0.022                   | 0.091        | 8.163           | -                 | 16.978            | 0.072             | 1.490 | 1.364         | 0.968       | 0.582          | 5.234        |
| 2015         | 6.08         | 0.796     | 0.023                   | 0.109        | 9.820           | 0.789             | 19.756            | 0.069             | 0.812 | 0.644         | 0.544       | 0.596          | 5.312        |
|              | 6.18         | 0.792     | 0.029                   | 0.139        | 11.344          | 0.760             | 24.248            | 0.111             | 1.225 | 1.114         | 0.638       | 0.550          | 4.447        |
|              | 6.25         | 0.329     | 0.027                   | 0.062        | 4.576           | 0.430             | 16.514            | 0.028             | 0.289 | 0.540         | 0.220       | 0.555          | 4.780        |

The “-” represents not detected.
